# Supplementary material for: N-Acetylaspartyl-Glutamate Metabolism in the Cingulated Cortices as a Biomarker of the Etiology in ASD: A 1H-MRS Model
Source: PubMed Central journal article supplement (PMC7866086; doi:10.3390/molecules26030675), 2021-01-28
Supplement: molecules-26-00675-s001.pdf [file molecules-26-00675-s001.pdf]

## Supplementary Materials

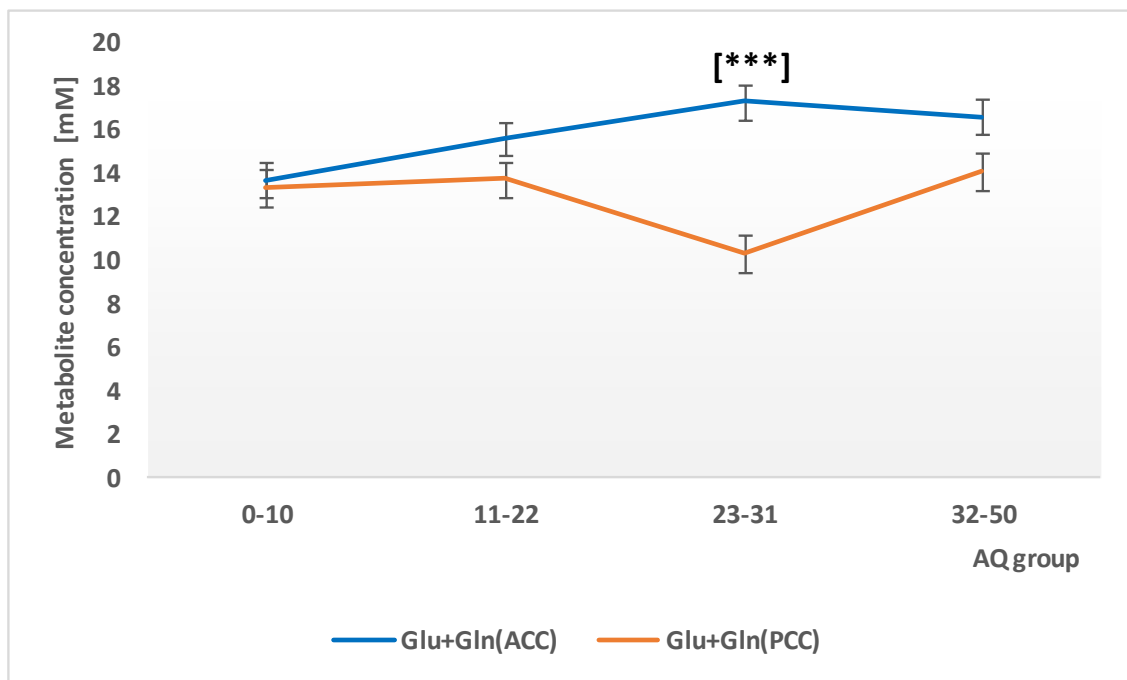

**Figure S1.** I Individual trajectories of (Glu + Gln); absolute metabolite concentration between ACC and PCC within the AQ test score. AQ1 = 28.3% ( $n = 17$ ); AQ2 = 43.3% ( $n = 26$ ); AQ3 = 10.0% ( $n = 9$ ); and AQ4 = 18.3% ( $n = 13$ ). Figure shows all subjects used for quantification. Graphs showing the quantification are included in Figure 2.  $p < 0.05$  considered significantly different, [\*\*\*] significant at  $p < 0.001$  respectively.

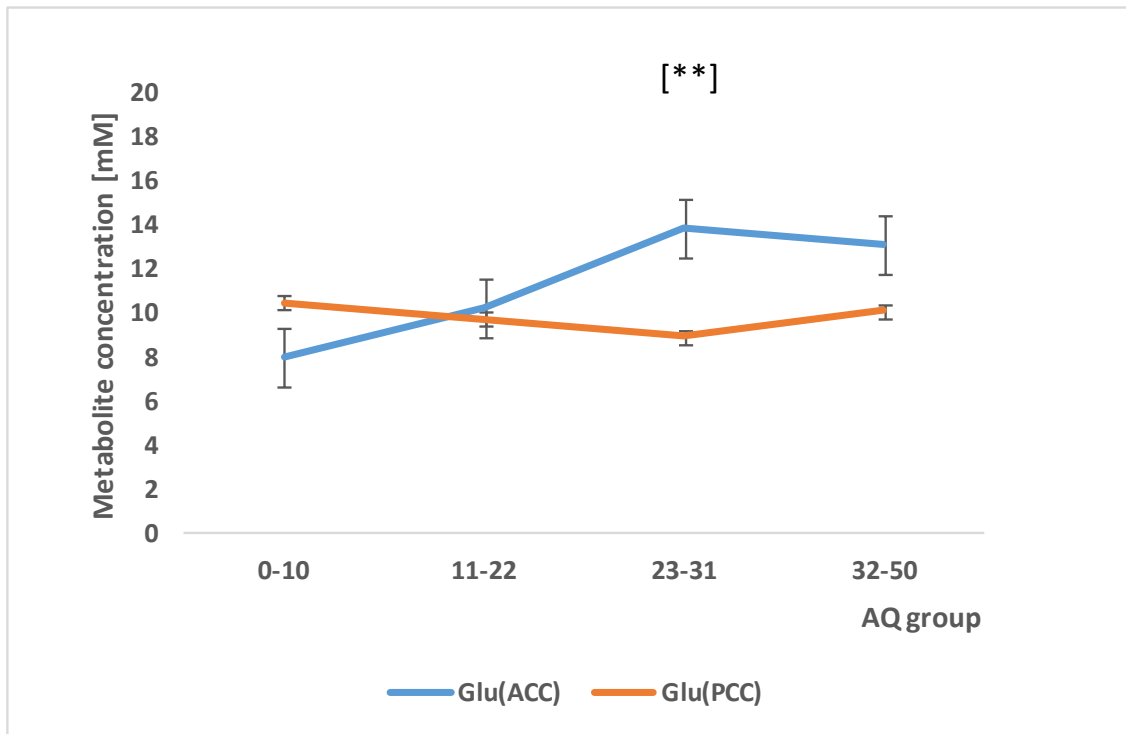

**Figure S2.** I Individual trajectories of (Glu); absolute metabolite concentration between ACC and PCC within the AQ test score. AQ1 = 28.3% ( $n = 17$ ); AQ2 = 43.3% ( $n = 26$ ); AQ3 = 10.0% ( $n = 9$ ); and AQ4 = 18.3% ( $n = 13$ ). Figure shows all subjects used for quantification. Graphs showing the quantification are included in Figure 2.  $p < 0.05$  considered significantly different, [\*\*] significant at  $p < 0.01$  respectively.

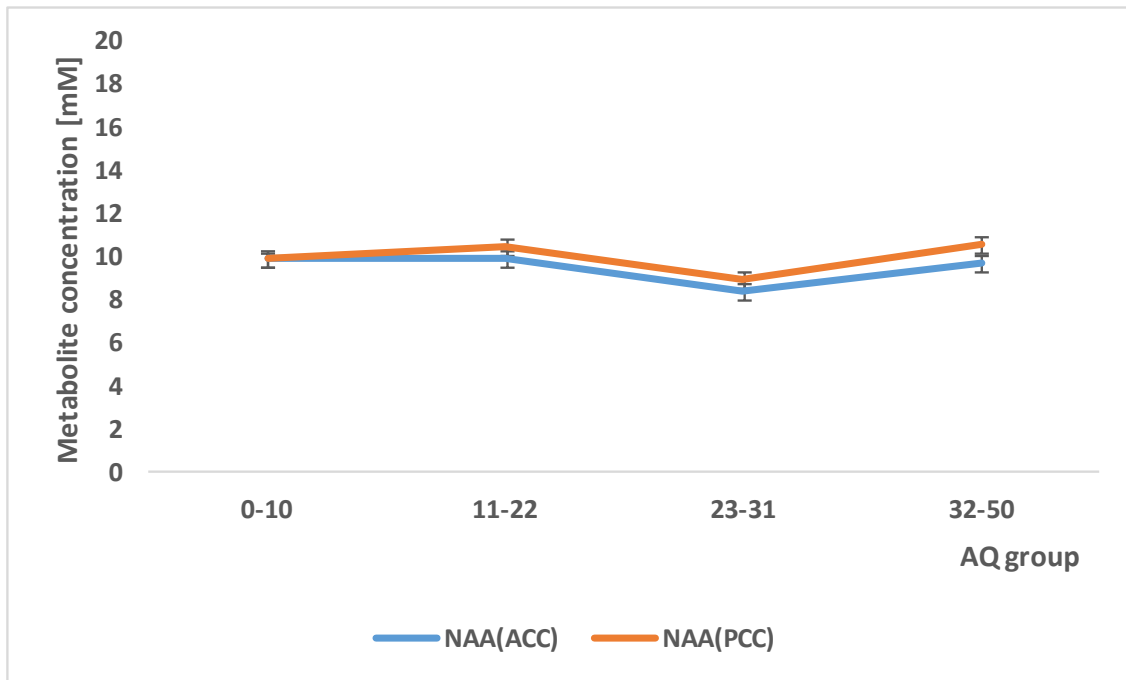

**Figure S3.** I Individual trajectories of (NAA); absolute metabolite concentration between ACC and PCC within the AQ test score. AQ1 = 28.3% ( $n = 17$ ); AQ2 = 43.3% ( $n = 26$ ); AQ3 = 10.0% ( $n = 9$ ); and AQ4 = 18.3% ( $n = 13$ ). Figure shows all subjects used for quantification. Graphs showing the quantification are included in Figure 2.  $p < 0.05$  considered significantly different.

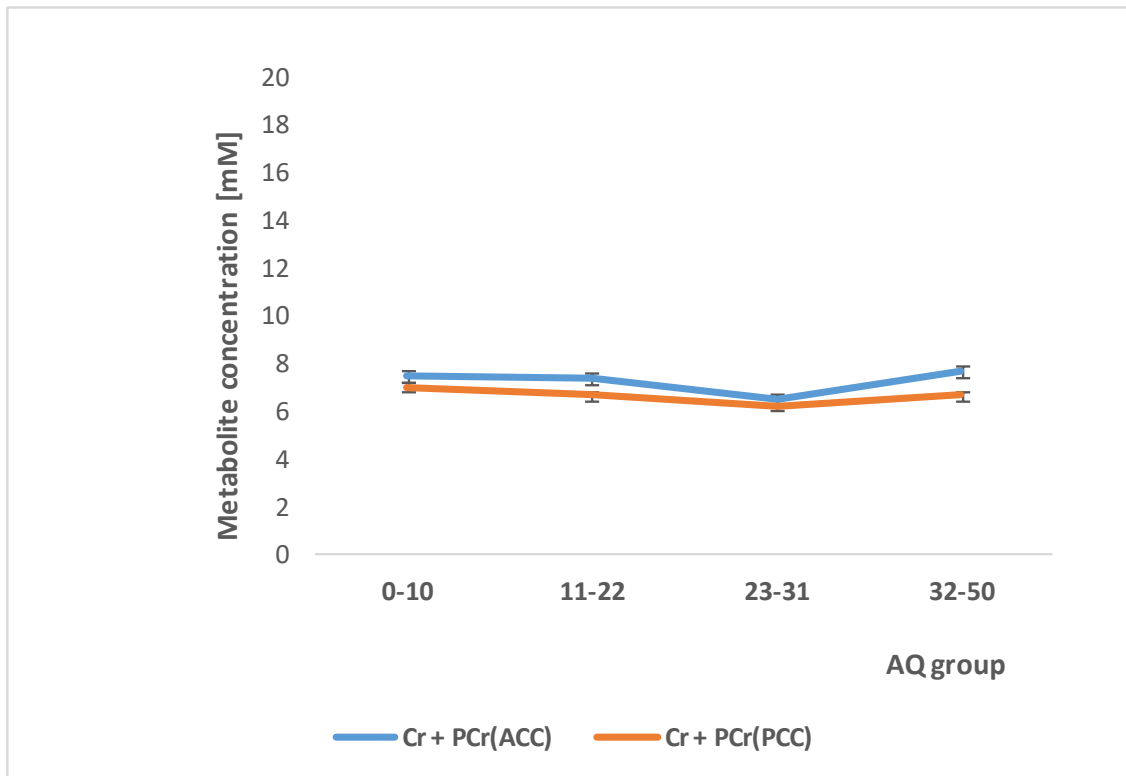

**Figure S4.** I Individual trajectories of (Cr + PCr); absolute metabolite concentration between ACC and PCC within the AQ test score. AQ1 = 28.3% ( $n = 17$ ); AQ2 = 43.3% ( $n = 26$ ); AQ3 = 10.0% ( $n = 9$ ); and AQ4 = 18.3% ( $n = 13$ ). Figure shows all subjects used for quantification. Graphs showing the quantification are included in Figure 2.  $p < 0.05$  considered significantly different.

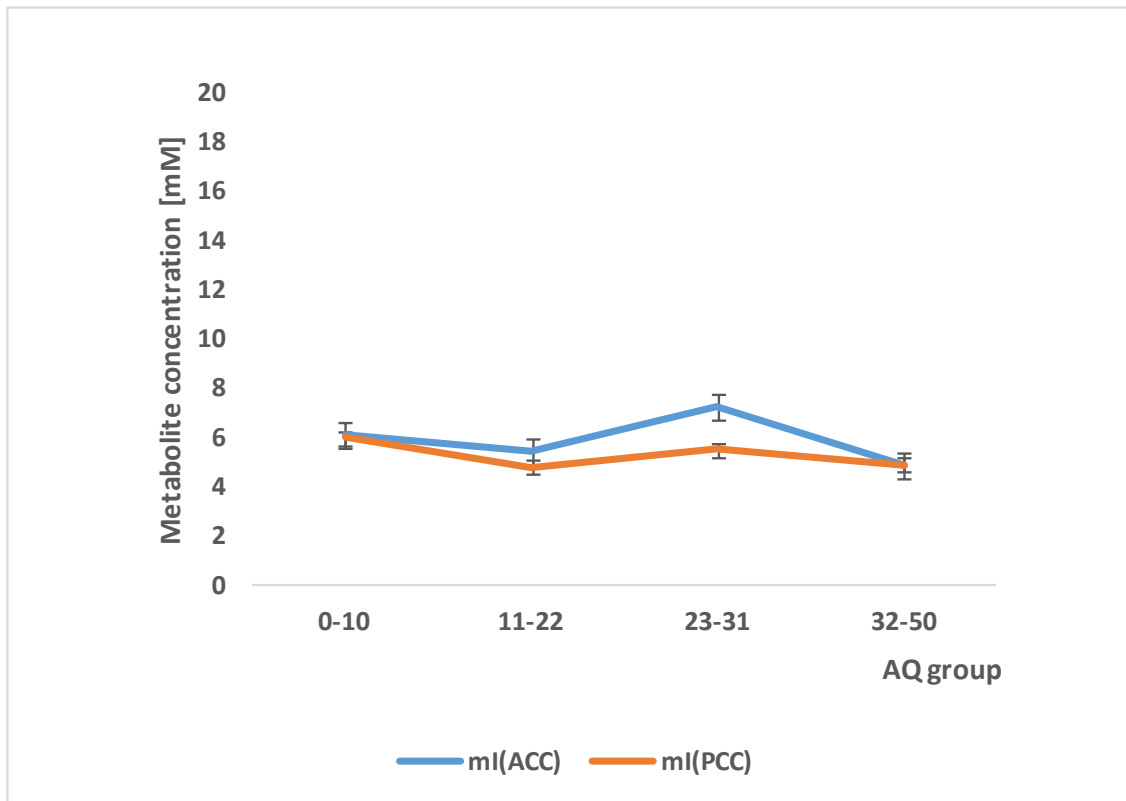

**Figure S5. I** Individual trajectories of (mI); absolute metabolite concentration between ACC and PCC within the AQ test score. AQ1 = 28.3% ( $n = 17$ ); AQ2 = 43.3% ( $n = 26$ ); AQ3 = 10.0% ( $n = 9$ ); and AQ4 = 18.3% ( $n = 13$ ). Figure shows all subjects used for quantification. Graphs showing the quantification are included in Figure 2.  $p < 0.05$  considered significantly different.

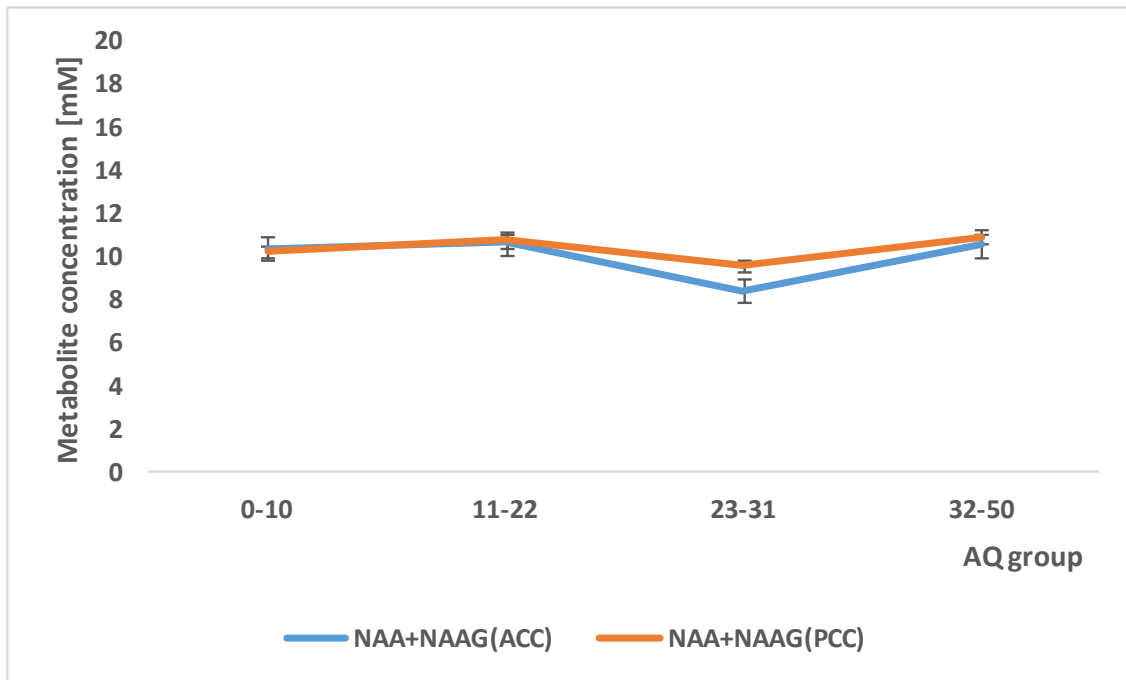

**Figure S6.** Individual trajectories of (NAA + NAAG); absolute metabolite concentration between ACC and PCC within the AQ test score. AQ1 = 28.3% ( $n = 17$ ); AQ2 = 43.3% ( $n = 26$ ); AQ3 = 10.0% ( $n = 9$ ); and AQ4 = 18.3% ( $n = 13$ ). Figure shows all subjects used for quantification. Graphs showing the quantification are included in Figure 2.  $p < 0.05$  considered significantly different.

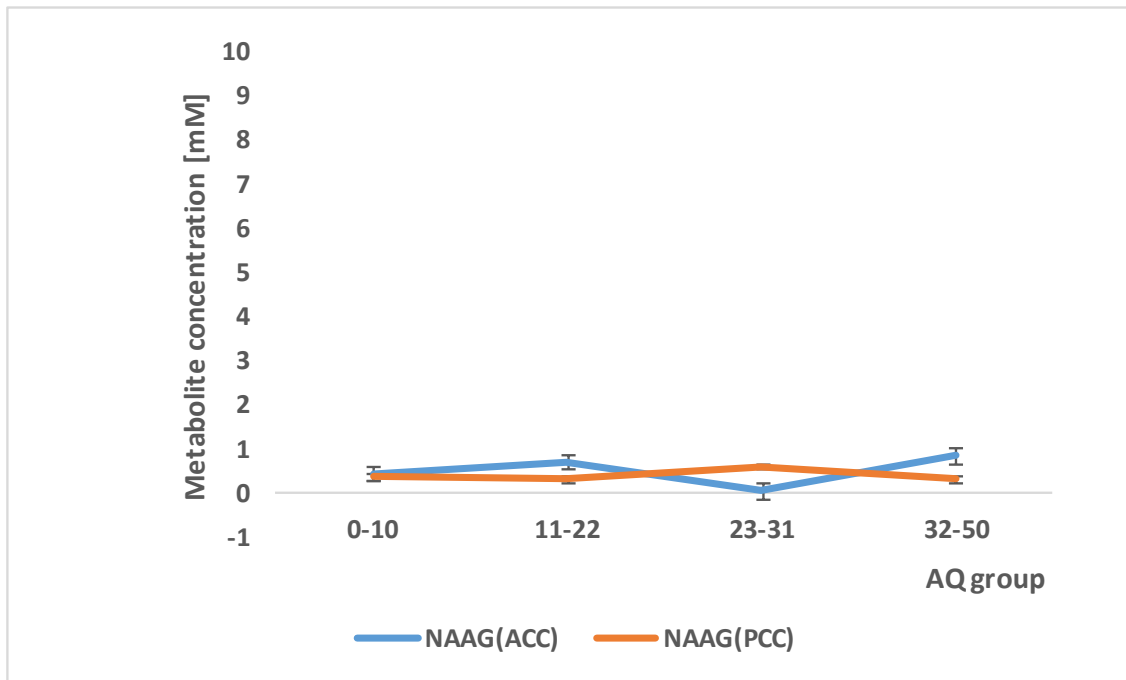

**Figure S7. I** Individual trajectories of (NAAG); absolute metabolite concentration between ACC and PCC within the AQ test score. AQ1 = 28.3% ( $n = 17$ ); AQ2 = 43.3% ( $n = 26$ ); AQ3 = 10.0% ( $n = 9$ ); and AQ4 = 18.3% ( $n = 13$ ). Figure shows all subjects used for quantification. Graphs showing the quantification are included in Figure 2.  $p < 0.05$  considered significantly different.

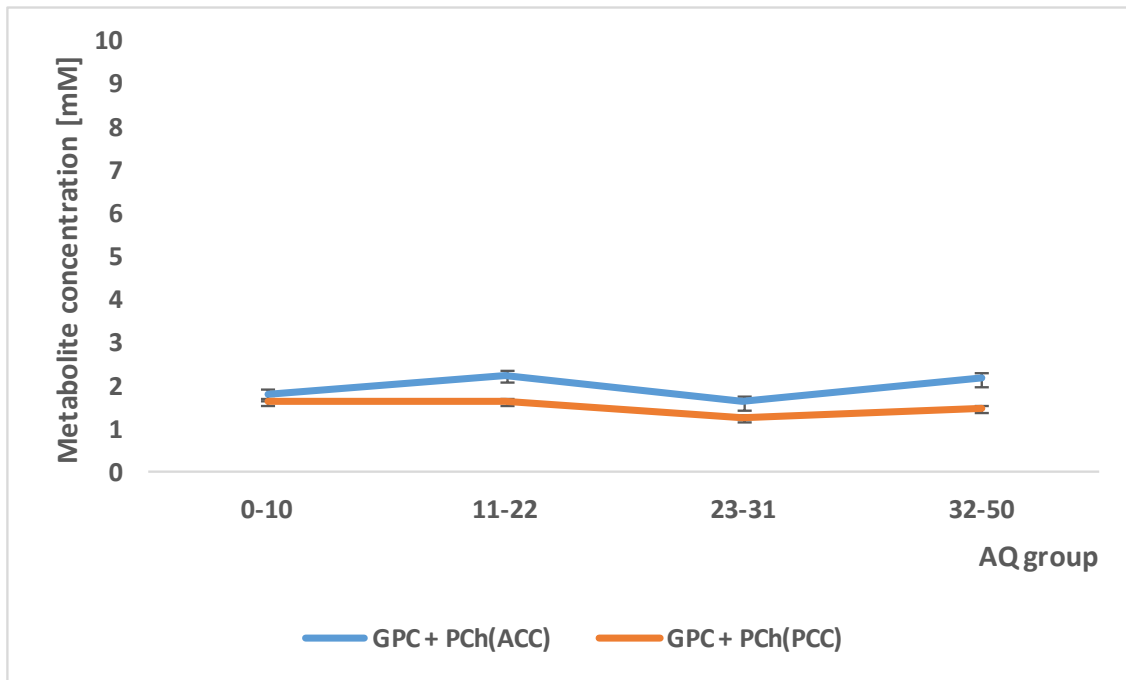

**Figure S8. I** Individual trajectories of (GPC + PCh); absolute metabolite concentration between ACC and PCC within the AQ test score. AQ1 = 28.3% ( $n = 17$ ); AQ2 = 43.3% ( $n = 26$ ); AQ3 = 10.0% ( $n = 9$ ); and AQ4 = 18.3% ( $n = 13$ ). Figure shows all subjects used for quantification. Graphs showing the quantification are included in Figure 2.  $p < 0.05$  considered significantly different.
